# Supplementary material for: A randomized trial of interpersonal psychotherapy, problem solving therapy, and supportive therapy for major depressive disorder in women with breast cancer
Source: Springer Nature journal article supplement (doi:10.1007/s10549-018-4994-5), 2018-10-20
Supplement: MOESM1 [file 16214538]

Supplemental Table 1. Unadjusted Hazard Ratios for Predictors of Dropout From Any Intervention

|  | | | | Parameter Estimate | SE | Wald | df | P | Hazard Ratio | Hazard Ratio 95% CI | |
| --- | --- | --- | --- | --- | --- | --- | --- | --- | --- | --- | --- |
| Lower | Upper |
| Treatment | | | |  |  | 1.08 | 2 | 0.58 |  |  |  |
|  | IPT vs BSP | | | 0.33 | 0.32 | 1.05 | 1 | 0.31 | 1.39 | 0.74 | 2.62 |
| BSP vs PST | | | 0.14 | 0.34 | 0.18 | 1 | 0.67 | 1.16 | 0.59 | 2.25 |
| IPT vs PST | | | 0.19 | 0.31 | 0.37 | 1 | 0.55 | 1.20 | 0.66 | 2.20 |
| Education (years) | | | |  |  | 7.65 | 2 | **0.02** |  |  |  |
|  | < 12 vs ≥16 | | | 0.97 | 0.36 | 7.52 | 1 | **0.01** | 2.64 | 1.32 | 5.30 |
| ≥12 < 16 vs ≥ 16 | | | 0.69 | 0.34 | 4.08 | 1 | **0.04** | 2.00 | 1.02 | 3.91 |
| < 12 vs ≥12 < 16 | | | -0.28 | 0.30 | 0.89 | 1 | 0.36 | 0.76 | 0.42 | 1.35 |
| Marital Status | | | |  |  |  |  |  |  |  |  |
|  | Single (never married)  vs Married / Living with Partner | | | -0.32 | 0.29 | 1.23 | 1 | 0.27 | 0.72 | 0.41 | 1.28 |
| Income | | | |  |  | 5.28 | 2 | 0.07 |  |  |  |
|  | | | Choose not to answer vs ≥20K | -0.13 | 0.38 | 0.12 | 1 | 0.73 | 0.87 | 0.41 | 1.85 |
| ≥ 20K vs < 20K | -0.64 | 0.30 | 4.64 | 1 | **0.03** | 0.53 | 0.29 | 0.94 |
| Choose not to answer vs < 20K | -0.51 | 0.35 | 2.09 | 1 | 0.15 | 0.60 | 0.30 | 1.20 |
| Ethnicity | | | |  |  |  |  |  |  |  |  |
|  | Non-Hispanic vs Hispanic | | | -0.15 | 0.27 | 0.30 | 1 | 0.59 | 0.86 | 0.51 | 1.47 |
| Employment | | | |  |  |  |  |  |  |  |  |
|  | Employed/Student vs  Unemployed | | | -0.13 | 0.27 | 0.003 | 1 | 0.96 | 0.99 | 0.59 | 1.66 |
| SF-12 | | | |  |  |  |  |  |  |  |  |
|  | PCS at Baseline | | | -0.02 | 0.02 | 1.99 | 1 | 0.16 | 0.98 | 0.95 | 1.01 |
|  | MCS at Baseline | | | -0.004 | 0.01 | 0.05 | 1 | 0.82 | 1.00 | 0.96 | 1.03 |
| BPI | | | |  |  |  |  |  |  |  |  |
|  | | Severity at Baseline | | 0.05 | 0.06 | 0.70 | 1 | 0.40 | 1.05 | 0.94 | 1.17 |
|  | | Interference at Baseline | | 0.002 | 0.05 | 0.001 | 1 | 0.98 | 1.00 | 0.91 | 1.11 |
| Age (years) | | | | -0.01 | 0.01 | 0.60 | 1 | 0.44 | 0.99 | 0.96 | 1.02 |
